# Supplementary material for: Complete hazard ranking to analyze right-censored data: An ALS survival study
Source: PubMed Central journal article supplement (PMC5749893; doi:10.1371/journal.pcbi.1005887), 2017-12-18
Supplement: pcbi.1005887.s001.pdf [file pcbi.1005887.s001.pdf]

## Supporting information

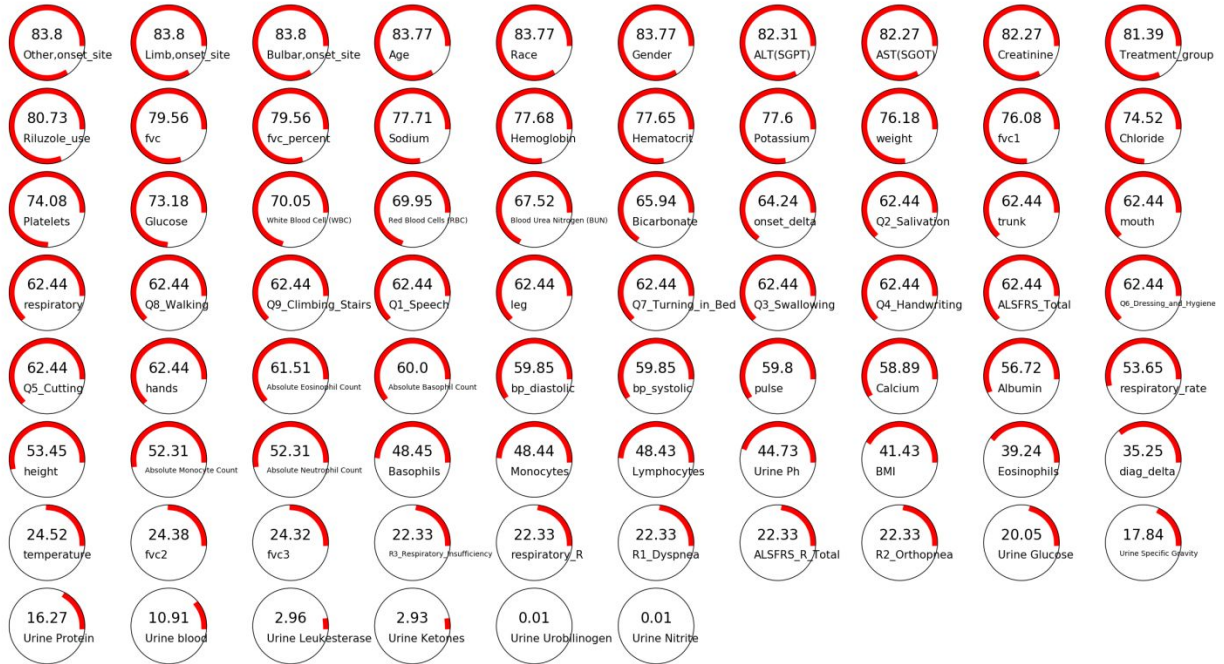

**S1 Fig. Data Availability in Percentage.** The percentage of the available values coverage for each feature. Some related features, which share the same coverage, for instance, race information ('race, white'; 'race, black'; 'race, other'; etc.) are merged into one.
