# Supplementary material for: Complete hazard ranking to analyze right-censored data: An ALS survival study
Source: PubMed Central journal article supplement (PMC5749893; doi:10.1371/journal.pcbi.1005887), 2017-12-18
Supplement: pcbi.1005887.s002.pdf [file pcbi.1005887.s002.pdf]

| Feature                 | Group | ALSFRS Only Cohort<br>(n = 3102) | ALSFRS + ALSFRS_R<br>Cohort (n = 1736) |
|-------------------------|-------|----------------------------------|----------------------------------------|
| ALSFRS_Total            | 4838  | 29.46 ± 5.96                     | 30.47 ± 5.11                           |
| ALSFRS_R_Total          | 1736  | NA                               | 38.27 ± 5.29                           |
| fvc (L)                 | 6629  | 3.24 ± 1.15 (3100)               | 3.38 ± 1.02 (1508)                     |
| Weight (kg)             | 5904  | 73.34 ± 15.27 (3102 )            | 76.88 ± 15.51 (1734)                   |
| fvc1(fvc trial 1 in L)  | 6336  | 3.27 ± 1.15 (3099 )              | 3.41 ± 1.03 ( 1508 )                   |
| mouth                   | 4838  | 10.06 ± 2.37 ( 3102 )            | 10.35 ± 2.18 ( 1736 )                  |
| Q3_swallowing           | 4838  | 3.50 ± 0.73 ( 3102 )             | 3.55 ± 0.71 ( 1736 )                   |
| Q8_walking              | 4838  | 2.68 ± 0.99 ( 3102 )             | 2.74 ± 0.95 ( 1736 )                   |
| leg                     | 4838  | 4.67 ± 2.31 ( 3102 )             | 4.83 ± 2.23 ( 1736 )                   |
| fvc2 (fvc trial 2 in L) | 1931  | 2.94 ± 1.29 (1020 )              | 3.21 ± 0.96 ( 909 )                    |
| Chloride (mmol/L )      | 5830  | 102.49 ± 3.92 (3094)             | 102.82 ± 3.28 ( 1331 )                 |
| respiratory             | 4838  | 3.68 ± 0.52 ( 3102 )             | 3.67 ± 0.60( 1736 )                    |

**S1 Table. Summary statistics by ALSFRS groups**
